# Supplementary material for: Quantitative Foveal Structural Metrics as Predictors of Visual Acuity in Human Albinism
Source: PubMed Central journal article supplement (PMC10916884; doi:10.1167/iovs.65.3.3), 2024-03-05
Supplement: iovs-65-3-3_s001.pdf [file iovs-65-3-3_s001.pdf]

**Supplementary Table S1:** Participant cohort

| Participant ID        | Sex* | Age (years) | Genotype <sup>†</sup>                                                                                | Albinism Status | Eye Used <sup>‡</sup> | Foveal Hypoplasia Grade | Visual Acuity (logMAR) <sup>§</sup> |
|-----------------------|------|-------------|------------------------------------------------------------------------------------------------------|-----------------|-----------------------|-------------------------|-------------------------------------|
| JC_0103               | M    | 16          | <i>GPR143</i> c.797T>C, p.L266P (hemi; VUS)                                                          | Suspected       | OD                    | 3                       | 0.60                                |
| JC_0131               | M    | 20          | <i>OCA2</i> c.2228C>T; p.P743L                                                                       | Likely          | OD                    | 1b                      | 0.28                                |
| JC_0150               | F    | 21          | No pathogenic variants detected                                                                      | Suspected       | OD                    | 1b                      | 0.56                                |
| JC_0156 <sup>#</sup>  | F    | 10          | <i>TYR</i> c.575C>A, p.S192Y<br><i>TYR</i> c.1118C>A, p.T373K                                        | Likely          | N/A                   | N/A                     | N/A                                 |
| JC_0157 <sup>#</sup>  | M    | 12          | <i>TYR</i> c.575C>A, p.S192Y<br><i>TYR</i> c.1118C>A, p.T373K                                        | Likely          | N/A                   | N/A                     | N/A                                 |
| JC_0456               | M    | 14          | <i>OCA2</i> c.1327G>A, p.V443I<br><i>OCA2</i> c.1555_delG (fs)<br><i>TYRP1</i> c.1103_delA           | Confirmed       | OS                    | 1a                      | 0.54                                |
| JC_0459               | F    | 21          | <i>OCA2</i> c.2339G>A, p.G780D (hom)                                                                 | Confirmed       | OS                    | 3                       | 0.68 <sup>  </sup>                  |
| JC_0492               | F    | 28          | <i>TYR</i> c.1147G>A, p.D383N<br><i>TYR</i> c.1217C>T, p.P406L                                       | Confirmed       | OD                    | 1b                      | 0.14                                |
| JC_0494               | M    | 9           | <i>OCA2</i> c.868A>G, R290G<br><i>OCA2</i> c.1465A>G, N489D                                          | Confirmed       | OS                    | 2                       | 0.60                                |
| KS_0551               | M    | 30          | <i>GPR143</i> c.112G>A, p.G38R (VUS)                                                                 | Suspected       | OS                    | 2                       | 0.68 <sup>  </sup>                  |
| JC_0598               | M    | 9           | <i>TYR</i> c.575C>A, S192Y (hom)<br><i>OCA2</i> c.1327G>A, p.V443I                                   | Likely          | OD                    | 1b                      | 0.54 <sup>  </sup>                  |
| DC_0831               | M    | 7           | <i>TYR</i> c.575C>A, p.S192Y<br><i>TYR</i> c.1205G>A, p.R402Q<br><i>TYR</i> c.1467_1468insT (fs)     | Likely          | OD                    | 1b                      | 0.34 <sup>  </sup>                  |
| JC_10061              | M    | 28          | <i>OCA2</i> 2.7kb_del (hom)                                                                          | Confirmed       | OD                    | 3                       | 0.60                                |
| JC_10073              | F    | 23          | <i>TYR</i> c.976C>T, p.Q326* (hom)                                                                   | Confirmed       | OS                    | 3                       | 0.74                                |
| JC_10074              | F    | 20          | <i>OCA2</i> c.2207C>T, p.S736L (VUS)                                                                 | Suspected       | OD                    | 2                       | 0.56                                |
| JC_10081 <sup>#</sup> | F    | 11          | <i>OCA2</i> c.79G>A, p.G27R (hom; VUS)                                                               | Suspected       | N/A                   | 2                       | 0.76                                |
| JC_10092              | F    | 22          | <i>TYR</i> c.575C>A, p.S192Y (hom)<br><i>TYR</i> c.1118C>A, p.T373K<br><i>TYR</i> c.1205G>A, p.R402Q | Likely          | OD                    | 2                       | 0.66                                |
| JC_10093              | M    | 22          | <i>TYR</i> c.1205G>A, p.R402Q (hom)<br><i>GPR143</i> c.346T>G, p.C116G (hemi)                        | Confirmed       | OS                    | 2                       | 0.56                                |
| TC_10110              | F    | 50          | <i>TYR</i> c.1205G>A, p.R402Q (hom)                                                                  | Suspected       | OS                    | 1b                      | 0.12                                |

|                       |   |    |                                                                                    |           |     |     |                    |
|-----------------------|---|----|------------------------------------------------------------------------------------|-----------|-----|-----|--------------------|
| DC_10138 <sup>#</sup> | M | 7  | TYR c.26T>C, p.L9P (VUS)<br>TYR c.980A>G, p.Y327C<br>OCA2 c.1109T>C, p.I370T (VUS) | Likely    | N/A | N/A | N/A                |
| JC_10192              | F | 6  | TYR c.575C>A, p.S192Y<br>TYR c.1205G>A, p.R402Q                                    | Suspected | OD  | 1b  | 0.46               |
| JC_10193              | M | 16 | OCA2 c.1327G>A, p.V443I (hom)                                                      | Confirmed | OD  | 1b  | 0.24               |
| JC_10203              | F | 6  | TYR c.575C>A, p.S192Y<br>TYR c.1205G>A, p.R402Q<br>TYR c.1467_1468insT (fs)        | Likely    | OD  | 2   | 0.62               |
| JC_10227              | F | 18 | TYR c.575C>A, p.S192Y<br>OCA2 c.1327G>A, p.V443I                                   | Likely    | OD  | 2   | 0.32               |
| JC_10228              | F | 15 | TYR c.575C>A, p.S192Y<br>OCA2 c.1327G>A, p.V443I                                   | Likely    | OS  | 1b  | 0.56               |
| JC_10230              | F | 18 | TYR c.575C>A, p.S192Y (hom)<br>TYR c.1205G>A, p.R402Q<br>TYR c.1265G>A, p.R422Q    | Likely    | OD  | 2   | 0.56               |
| JC_10269              | F | 5  | TYR c.575C>A, p.S192Y<br>HPS6 c.108_109ins22bp (fs)                                | Likely    | OS  | 2   | 0.84               |
| JC_10278              | M | 14 | TYR c.286_287insA (fs)<br>TYR c.575C>A, p.S192Y<br>TYR c.1205G>A, p.R402Q          | Likely    | OD  | 1b  | 0.18               |
| JC_10279 <sup>#</sup> | M | 12 | TYR c.832C>T, p.R278*<br>TYR c.929_930insC (fs)                                    | Confirmed | N/A | N/A | N/A                |
| JC_10287              | M | 10 | GPR143 exon4-9_del (hemi)                                                          | Confirmed | OD  | 2   | 0.50               |
| KS_10314              | F | 5  | TYR c.1A>G, p.M1V<br>TYR c.575C>A, p.S192Y<br>TYR c.1205G>A, p.R402Q (hom)         | Likely    | OD  | 2   | 0.44 <sup>ll</sup> |
| JC_10496              | M | 69 | TYR c.1205G>A, p.R402Q<br>OCA2 c.1327G>A, p.V443I<br>OCA2 c.1465A>G, p.N489D       | Confirmed | OD  | 1b  | 0.32               |
| JC_10508              | F | 37 | TYR c.575C>A, p.S192Y<br>TYR c.1118C>A, p.T373K<br>TYR c.1205G>A, p.R402Q (hom)    | Likely    | OD  | 2   | 0.16               |
| JC_10552              | F | 10 | OCA2 c.1842+2T>C (splice site)                                                     | Likely    | OD  | 3   | 0.48               |
| JC_10725              | F | 25 | TYR c.338_339insAG (fs)<br>TYR c.368T>C, p.I123T                                   | Confirmed | OD  | 2   | 0.60               |

|                       |   |    |                                                                                                          |           |     |     |      |
|-----------------------|---|----|----------------------------------------------------------------------------------------------------------|-----------|-----|-----|------|
| JC_10726              | M | 23 | TYR c.338_339insAG (fs)<br>TYR c.368T>C, p.I123T                                                         | Confirmed | OD  | 2   | 0.82 |
| JC_10746 <sup>#</sup> | F | 20 | TYR c.529G>A, p.V177I<br>TYR c.575C>A, p.S192Y<br>TYR c.1118C>A, p.T373K<br>TYR c.1205G>A, p.R402Q       | Confirmed | N/A | N/A | N/A  |
| JC_10797              | M | 17 | TYR c.1205G>A, p.R402Q<br>SLC45A2 c.443G>A, p.G148D (VUS)<br>SLC45A2 c.665C>A, p.S222Y (VUS)             | Suspected | OD  | 1b  | 0.46 |
| JC_10841              | M | 25 | TYR c.575C>A, p.S192Y<br>TYR c.1205G>A, p.R402Q<br>HPS3 c.15C>G, p.Y5*<br>HPS3 c.2464C>T, p.R822*        | Confirmed | OS  | 2   | 0.72 |
| BB_10965              | F | 44 | TYR c.1205G>A, p.R402Q (hom)<br>SLC24A5 c.1361T>A, p.L454* (hom)                                         | Confirmed | OS  | 1b  | 0.24 |
| GS_10977              | F | 18 | OCA2 c.1327G>A, p.V443I                                                                                  | Likely    | OD  | 2   | 0.62 |
| GS_10979              | M | 17 | TYR c.575C>A, p.S192Y (hom)<br>TYR c.1205G>A, p.R402Q (hom)                                              | Suspected | OD  | 1b  | 0.08 |
| JC_11046              | M | 37 | TYR c.575C>A, p.S192Y<br>OCA2 c.1327G>A, p.V443I                                                         | Likely    | OS  | 2   | 0.66 |
| JC_11084 <sup>#</sup> | M | 54 | TYR c.1A>G, p.M1V<br>TYR c.242C>T, p.P81L<br>TYR c.575C>A, p.S192Y<br>TYR c.1205G>A, p.R402Q             | Confirmed | N/A | 2   | 1.06 |
| GS_11148              | F | 9  | TYR c.575C>A, p.S192Y<br>TYR c.1147G>A, p.D383N<br>TYR c.1205G>A, p.R402Q (hom)                          | Likely    | OD  | 1b  | 0.24 |
| JC_11430              | F | 16 | TYR c.575C>A, p.S192Y<br>TYR c.1205G>A, p.R402Q<br>TYR c.1423_1433del11bp (fs)                           | Likely    | OD  | 2   | 0.28 |
| DC_11476              | M | 17 | TYR c.1205G>A, p.R402Q<br>BLOC1S3 c.301_302insC (hom)                                                    | Confirmed | OD  | 4   | 0.88 |
| DC_11599 <sup>#</sup> | F | 6  | TYR c.575C>A, p.S192Y<br>TYR c.1118C>A, p.T373K<br>TYR c.1205G>A, p.R402Q<br>TYR c.1430_1442del13bp (fs) | Confirmed | N/A | N/A | N/A  |

|                       |   |    |                                                                                           |           |     |     |      |
|-----------------------|---|----|-------------------------------------------------------------------------------------------|-----------|-----|-----|------|
| GS_11807              | M | 37 | TYR c.575C>A, p.S192Y (hom)<br>GPR143 exon1-2_del (hemi)                                  | Confirmed | OS  | 3   | 0.68 |
| JC_11817 <sup>#</sup> | F | 23 | TYR c.575C>A, p.S192Y (hom)<br>TYR c.1118C>A, p.T373K (hom)                               | Confirmed | N/A | N/A | N/A  |
| JC_11822              | F | 40 | TYR c.575C>A, p.S192Y<br>TYR c.729_730delGT (fs)<br>TYR c.1118C>A, p.T373K                | Confirmed | OD  | 2   | 0.74 |
| JC_11824              | F | 12 | TYR c.823G>T, p.V275F<br>TYR c.1336G>A, p.G446S                                           | Confirmed | OS  | 3   | 0.54 |
| JC_11825 <sup>#</sup> | M | 12 | TYR c.823G>T, p.V275F<br>TYR c.1336G>A, p.G446S                                           | Confirmed | N/A | N/A | N/A  |
| AD_11837              | M | 17 | TYR c.575C>A, p.S192Y<br>TYR c.823G>T, p.V275F<br>TYR c.1205G>A, p.R402Q                  | Likely    | OD  | 1b  | 0.16 |
| JC_11841 <sup>#</sup> | M | 14 | No data                                                                                   | Suspected | N/A | N/A | N/A  |
| JC_11842 <sup>#</sup> | F | 10 | TYR c.71G>A, p.C24Y (VUS)<br>TYR c.230G>A, p.R77Q                                         | Likely    | N/A | N/A | N/A  |
| JC_11849              | F | 25 | TYR c.575C>A, p.S192Y (hom)<br>SLC45A2 c.3G>A, p.M1I<br>SLC45A2 c.1082T>C, p.L361P (VUS)  | Likely    | OS  | 2   | 0.54 |
| JC_11850              | M | 33 | TYR c.71G>A, p.C24Y (VUS)<br>TYR c.707G>C, p.W236S<br>TYR c.1205G>A, p.R402Q              | Likely    | OS  | 4   | 0.88 |
| JC_11851              | F | 37 | TYR c.575C>A, p.S192Y<br>TYR c.1101C>A, p.H367Q<br>TYR c.1118C>A, p.T373K                 | Confirmed | OD  | 2   | 0.72 |
| JC_11854              | F | 33 | OCA2 c.373_374delGA (fs)                                                                  | Likely    | OD  | 2   | 0.64 |
| JC_11895 <sup>#</sup> | M | 15 | TYR c.896G>A, p.R299H (hom)                                                               | Confirmed | N/A | N/A | N/A  |
| JC_11896              | F | 13 | OCA2 c.1349C>T, p.T450M<br>OCA2 c.1363A>G, p.R455G (VUS)<br>OCA2 c.1994C>T, p.A665V (VUS) | Likely    | OS  | 2   | 0.52 |
| AD_11897              | M | 49 | TYR c.823G>T, p.V275F<br>TYR c.1111A>T, p.N371Y                                           | Confirmed | OS  | 4   | 0.64 |

|                       |   |    |                                                                                                            |           |     |     |      |
|-----------------------|---|----|------------------------------------------------------------------------------------------------------------|-----------|-----|-----|------|
| JC_11898              | F | 30 | TYR c.575C>A, p.S192Y<br>OCA2 c.1327G>A, p.V443I<br>OCA2 c.1983G>T, p.L661F (VUS)                          | Likely    | OS  | 2   | 0.58 |
| JC_11899 <sup>#</sup> | F | 13 | TYR c.575C>A, p.S192Y<br>TYR c.1205G>A, p.R402Q (hom)<br>OCA2 c.632C>T, p.P211L<br>OCA2 c.1465A>G, p.N489D | Confirmed | N/A | N/A | N/A  |
| JC_11900              | F | 15 | TYR c.575C>A, p.S192Y<br>TYR c.1205G>A, p.R402Q (hom)<br>OCA2 c.632C>T, p.P211L<br>OCA2 c.1465A>G, p.N489D | Confirmed | OS  | 2   | 0.56 |
| GS_11902              | M | 16 | TYR c.575C>A, p.S192Y<br>GPR143 c.853A>T, p.R285* (hemi)                                                   | Confirmed | OD  | 3   | 0.64 |
| AD_11925              | M | 22 | TYR c.650G>A, p.R217Q<br>TYR c.823G>T, p.V275F<br>TYR c.1205G>A, p.R402Q                                   | Confirmed | OS  | 2   | 0.58 |
| JC_11934              | M | 10 | OCA2 c.163delG (fs)<br>HPS5 c.253C>T, p.H85Y (VUS)                                                         | Likely    | OS  | 2   | 1.00 |
| SS_11938              | F | 22 | OCA2 c.1327G>A, p.V443I                                                                                    | Suspected | OD  | 1b  | 0.14 |
| SS_11939              | M | 35 | TYR c.650G>A, p.R217Q<br>TYR c.823G>T, p.V275F<br>TYR c.1205G>A, p.R402Q                                   | Confirmed | OD  | 2   | 0.58 |
| AD_11940              | F | 16 | TYR c.-4586_del4461bp_insTT<br>TYR c.880G>A, p.E294K<br>TYR c.1205G>A, p.R402Q                             | Confirmed | OS  | 2   | 0.44 |
| AD_11941              | M | 11 | TYR c.613C>A, p.P205T<br>TYR c.1217C>T, p.P406L                                                            | Confirmed | OS  | 1b  | 0.34 |
| AD_11991              | M | 9  | TYR c.1205G>A, p.R402Q (hom)<br>GPR143 c.-171G>A (hemi; VUS)                                               | Suspected | OD  | 1b  | 0.80 |
| JC_11992              | M | 14 | TYR c.575C>A, p.S192Y (hom)<br>OCA2 c.1465A>G, p.N489D<br>OCA2 c.2330G>A, p.C777Y                          | Confirmed | OD  | 2   | 0.46 |
| AD_12015              | M | 46 | TYR c.575C>A, p.S192Y                                                                                      | Suspected | OD  | 1b  | 0.52 |
| AD_12016 <sup>#</sup> | F | 13 | TYR c.575C>A, p.S192Y<br>TYR c.1205G>A, p.R402Q                                                            | Suspected | OS  | 2   | 0.74 |

|                       |   |    |                                                                                                             |           |     |     |      |
|-----------------------|---|----|-------------------------------------------------------------------------------------------------------------|-----------|-----|-----|------|
| AD_12021              | M | 11 | TYR c.575C>A, p.S192Y<br>TYR c.1205G>A, p.R402Q<br>OCA2 c.1327G>A, p.V443I<br>HPS3 c.1136C>T, p.T379M (VUS) | Likely    | OS  | 1b  | 0.48 |
| AD_12090              | F | 19 | TYR c.1118C>A, p.T373K<br>TYR c.1205G>A, p.R402Q                                                            | Likely    | OS  | 1b  | 0.44 |
| AD_12112              | F | 10 | TYR c.575C>A, p.S192Y<br>TYR c.823G>T, p.V275F<br>TYR c.1205G>A, p.R402Q                                    | Likely    | OD  | 2   | 0.74 |
| SS_12121              | F | 5  | TYR c.575C>A, p.S192Y (hom)<br>OCA2 c.1255C>T, p.R419W<br>TYRP1 c.785C>T, p.T262M (VUS)                     | Likely    | OS  | 1a  | 0.66 |
| DC_12122              | F | 8  | OCA2 c.1025A>G, p.Y342C<br>OCA2 c.1465A>G, p.N489D                                                          | Confirmed | OD  | 1a  | 0.42 |
| SS_12124              | M | 9  | TYR c.1205G>A, p.R402Q (hom)<br>TYRP1 c.140_141delCT (fs)<br>TYRP1 c.194G>A, p.C65Y (VUS)                   | Confirmed | OD  | 1b  | 0.56 |
| JC_12260              | F | 48 | TYR c.575C>A, p.S192Y<br>TYR c.823G>T, p.V275F<br>TYR c.1205G>A, p.R402Q                                    | Confirmed | OS  | 2   | 0.16 |
| JC_12261 <sup>#</sup> | M | 9  | TYR c.823G>T, p.V275F (hom)<br>OCA2 c.1327G>A, p.V443I                                                      | Confirmed | N/A | N/A | N/A  |
| JC_12500              | F | 26 | TYR c.575C>A, p.S192Y<br>TYR c.1118C>A, p.T373K<br>TYR c.1147G>A, p.D383N                                   | Confirmed | OS  | 3   | 0.72 |
| JC_12501              | M | 30 | TYR c.976C>T, p.Q326* (hom)                                                                                 | Confirmed | OD  | 4   | 0.82 |
| JC_12522              | F | 22 | SLC45A2 c.310C>T, p.P104S<br>SLC45S2 c.606G>C, p.W202C                                                      | Confirmed | OD  | 2   | 0.74 |
| JC_12536              | M | 14 | TYR c.575C>A, p.S192Y<br>TYR c.1205G>A, p.R402Q<br>GPR143 exon 1 del (hemi)                                 | Confirmed | OS  | 4   | 0.72 |
| JC_12537              | M | 75 | TYR c.575C>A, p.S192Y<br>GPR143 exon 1 del (hemi)                                                           | Confirmed | OD  | 3   | 0.64 |

\*M = male, F = female

<sup>†</sup>fs = frameshift, hemi = hemizygous, hom = homozygous, kb = kilobases. All listed mutations are presumed to be pathogenic, except *TYR* p.S192Y, *TYR* p.R402Q, and any mutations noted as a variants of unknown significance (VUS).

<sup>‡</sup>OD = right eye, OS = left eye, N/A = not applicable

<sup>§</sup>logMAR = logarithm of minimum angle of resolution

<sup>||</sup>Visual acuity with correction; all other visual acuity measurements are best-corrected visual acuity.

<sup>#</sup>Participants were excluded from final analyses due to poor OCT image quality.
