# Supplementary material for: Quantitative Foveal Structural Metrics as Predictors of Visual Acuity in Human Albinism
Source: PubMed Central journal article supplement (PMC10916884; doi:10.1167/iovs.65.3.3), 2024-03-05
Supplement: iovs-65-3-3_s002.pdf [file iovs-65-3-3_s002.pdf]

**Supplementary Table S2: Novel presumed albinism-causing variants**

| Gene           | Variant                 | Subject              | Evidence of Pathogenicity* | ACMG Classification |
|----------------|-------------------------|----------------------|----------------------------|---------------------|
| <i>TYR</i>     | c.338_339insAG (fs)     | JC_10725<br>JC_10726 | PVS1, PM2, PP4             | Pathogenic          |
| <i>TYR</i>     | c.529G>A, p.V177I       | JC_10746             | PM2, PM5, PP3, PP4         | Likely pathogenic   |
| <i>TYR</i>     | c.1430_1442del13bp (fs) | DC_11599             | PVS1, PM2, PP4             | Pathogenic          |
| <i>OCA2</i>    | c.373_374delGA (fs)     | JC_11854             | PVS1, PM2, PP4             | Pathogenic          |
| <i>TYRP1</i>   | c.140_141delCT (fs)     | SS_12124             | PVS1, PM2, PP4             | Pathogenic          |
| <i>SLC45A2</i> | c.3G>A, p.M1I           | JC_11849             | PM1, PM2, PP3, PP4         | Likely pathogenic   |
| <i>GPR143</i>  | c.853A>T, p.R285*       | GS_11902             | PVS1, PM2, PP4             | Pathogenic          |

\*PVS = very strong evidence of pathogenicity; PM = moderate evidence of pathogenicity; PP = supporting evidence of pathogenicity. For a description of each numbered subtype of evidence of pathogenicity, see Richards et al.<sup>1</sup>

1. Richards S, Aziz N, Bale S, et al. Standards and guidelines for the interpretation of sequence variants: A joint consensus recommendation of the American College of Medical Genetics and Genomics and the Association for Molecular Pathology. *Genet Med* 2015;17:405-424.
